# Supplementary material for: Efficient Production of Lumichrome by Microbacterium sp. Strain TPU 3598
Source: PubMed Central journal article supplement — Appl Environ Microbiol. 2015 Oct 2;81(21):7360–7. doi: 10.1128/AEM.02166-15 (PMC4592859; doi:10.1128/aem.02166-15), 2015-10-02
Supplement: AEM.02166-15_zam999116662so1.pdf [file AEM.02166-15_zam999116662so1.pdf]

## Supplementary information

Efficient Production of Lumichrome by *Microbacterium* sp. TPU3598

Kazunori Yamamoto, Yasuhisa Asano #

Biotechnology Research Center and Department of Biotechnology, Toyama Prefectural

University, 5180 Kurokawa, Imizu, Toyama, 939-0398, Japan

Asano Active Enzyme Molecule Project, ERATO, JST, 5180 Kurokawa, Imizu, Toyama 939-

0398, Japan

GATGAACGCT GGCGGCGTGC TTAACACATG CAAGTCGAAC GGTGAACACG 50  
GAGCTTGCTC TGTGGGATCA GTGGCGAACG GGTGAGTAAC ACGTGAGCAA 100  
CCTGCCCTG ACTCTGGGAT AAGCGCTGGA AACGGCGTCT AATACTGGAT 150  
ATGTGACGTG ACCGCATGGT CTGCGTCTGG AAAGAATTC GGTTGGGGAT 200  
GGGCTCGCGG CCTATCAGCT TGTTGGTGAG GTAATGGCTC ACCAAGGCGT 250  
CGACGGGTAG CCGGCCTGAG AGGGTGACCG GCCACACTGG GACTGAGACA 300  
CGGCCAGAC TCCTACGGGA GGCAGCAGTG GGAATATTG CACAATGGGC 350  
GCAAGCCTGA TGCAGCAACG CCGCGTGAGG GACGACGGCC TTCGGGTTGT 400  
AAACCTCTTT TAGCAGGGAA GAAGCGAAAG TGACGGTACC TGCAGAAAAA 450  
GCGCCGGCTA ACTACGTGCC AGCAGCCGCG GTAATACGTA GGGCGCAAGC 500  
GTTATCCGGA ATTATTGGGC GTAAAGAGCT CGTAGGCGGT TTGTGCGGTC 550  
TGCTGTGAAA TCCGGAGGCT CAACCTCCGG CCTGCAGTGG GTACGGGCAG 600  
ACTAGAGTGC GGTAGGGGAG ATTGGAATTC CTGGTGTAGC GGTGGAATGC 650  
GCAGATATCA GGAGGAACAC CGATGGCGAA GGCAGATCTC TGGGCCGTAA 700  
CTGACGCTGA GGAGCGAAAG GGTGGGGAGC AAACAGGCTT AGATACCCTG 750  
GTAGTCCACC CCGTAAACGT TGGGAAGTAG TTGTGGGGTC CATTCCACGG 800  
ATTCCGTGAC GCAGCTAACG CATTAAAGTTC CCCGCCTGGG GAGTACGGCC 850  
GCAAGGCTAA AACTCAAAGG AATTGACGGG GACCCGCACA AGCGGCGGAG 900  
CATGCGGATT AATTCGATGC AACGCGAAGA ACCTTACCAA GGCTTGACAT 950  
ATACGAGAAC GGGCCAGAAA TGGTCAACTC TTTGGACACT CGTAAACAGG 1000  
TGGTGCATGG TTGTCGTCAG CTCGTGTCGT GAGATGTTGG GTTAAGTCCC 1050  
GCAACGAGCG CAACCCTCGT TCTATGTTGC CAGCACGTAA TGGTGGGAAC 1100  
TCATGGGATA CTGCCGGGGT CAACTCGGAG GAAGGTGGGG ATGACGTCAA 1150  
ATCATCATGC CCCTTATGTC TTGGGCTTCA CGCATGCTAC AATGGCCGGT 1200  
ACAAAGGGCT GCAATACCGC GAGGTGGAGC GAATCCCAA AAGCCGGTCC 1250  
CAGTTCGGAT TGAGGTCTGC AACTCGACCT CATGAAGTCG GAGTCGCTAG 1300  
TAATCGCAGA TCAGCAACGC TCGGGTGAAT ACGTTCCCGG GTCTTGTACA 1350  
CACCGCCCGT CAAGTCATGA AAGTCGGTAA CACCTGAAGC CCGTGGCCTA 1400  
ACCCTTGTGG AGGGAGCCGT CGAAGGTGGG ATCGGTAATT AGGACTAAGT 1450  
CGTAACAAGG TAGCCGTACC GGAAGGTGC 1479

**Fig. S1** 16S rDNA sequence of *Microbacterium* sp. TPU3598.

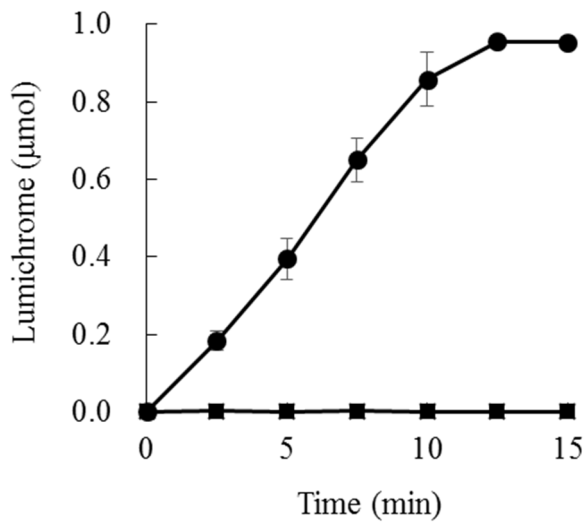

**Fig. S2** Time course of lumichrome production with cell-free extract and debris.

Lumichrome production was carried out for 15 min in 10 ml of 20 mM KPB, pH 7.0, containing 1.0 µmol of riboflavin (●: cell debris, ■: cell-free extract). Error bars indicate the standard deviations of three times. The cell-free extract and cell debris were prepared from 200 mg of cells, which were cultivated in 10 ml of the nutrient medium, pH 7.0, at 30°C for 24 h, by disruption with Multi-beads Shocker (Yasui Kikai, Osaka, Japan) (2700 rpm, 60 s on time, 60 s off time, 6 cycles, 0.1 mm YGB01 glass bead, 4 °C) and centrifugation (at  $22,300 \times g$ , 20 min, 4°C).
